# Supplementary material for: Improving the Reaction Kinetics by Annealing MoS2/PVP Nanoflowers for Sodium-Ion Storage
Source: MDPI journal article supplement (doi:10.3390/molecules28072948), 2023-03-25
Supplement: s1 [file s1]

*Supporting Information*

# Improving the Reaction Kinetics by Annealing MoS<sub>2</sub>/PVP Nanoflowers for Sodium-Ion Storage

Yuan Li <sup>1,2</sup>, Lingxing Zan <sup>3,\*</sup> and Jingbo Chen <sup>1,\*</sup>

<sup>1</sup> School of Materials Science and Engineering, Zhengzhou University, Zhengzhou 450001, China

<sup>2</sup> School of Mechanical Engineering, Henan Institute of Technology, Xinxiang 453000, China

<sup>3</sup> Key Laboratory of Chemical Reaction Engineering of Shaanxi Province; College of Chemistry & Chemical Engineering, Yan'an University, Yan'an 716000, China

Correspondence: zanlingxing@yau.edu.cn (L.Z.); chenjb@zzu.edu.cn (J.C.)

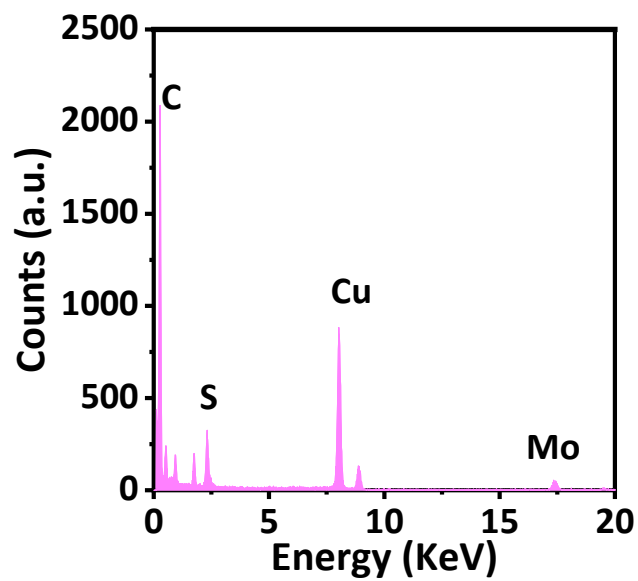

**Figure S1.** EDS analysis of MoS<sub>2</sub>/C.

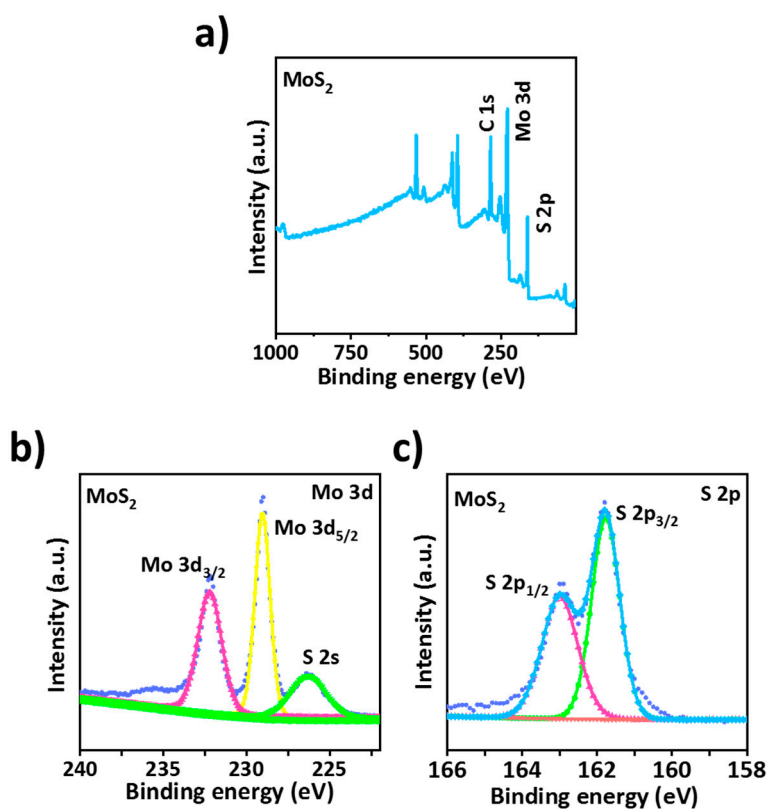

**Figure S2.** a) XPS survey scan of MoS<sub>2</sub>. High-resolution b) Mo 3d and c) S 2p spectra of MoS<sub>2</sub>, respectively.

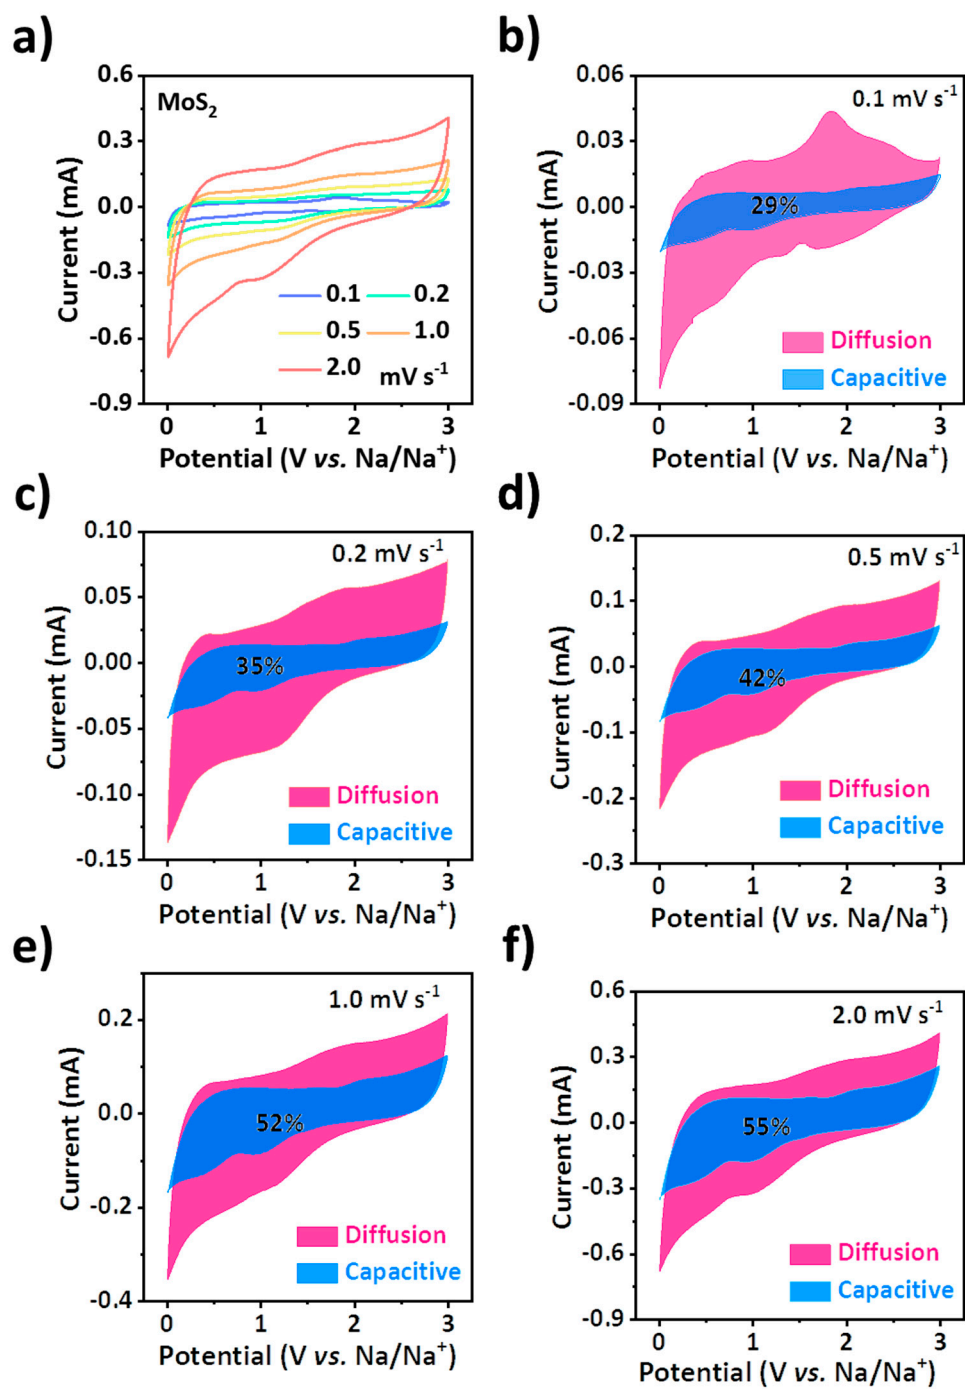

**Figure S3.** a) CV curves at various scan rates of MoS<sub>2</sub>. b-f) Capacitive-controlled and diffusion-controlled contributions at different scan rates of MoS<sub>2</sub>.

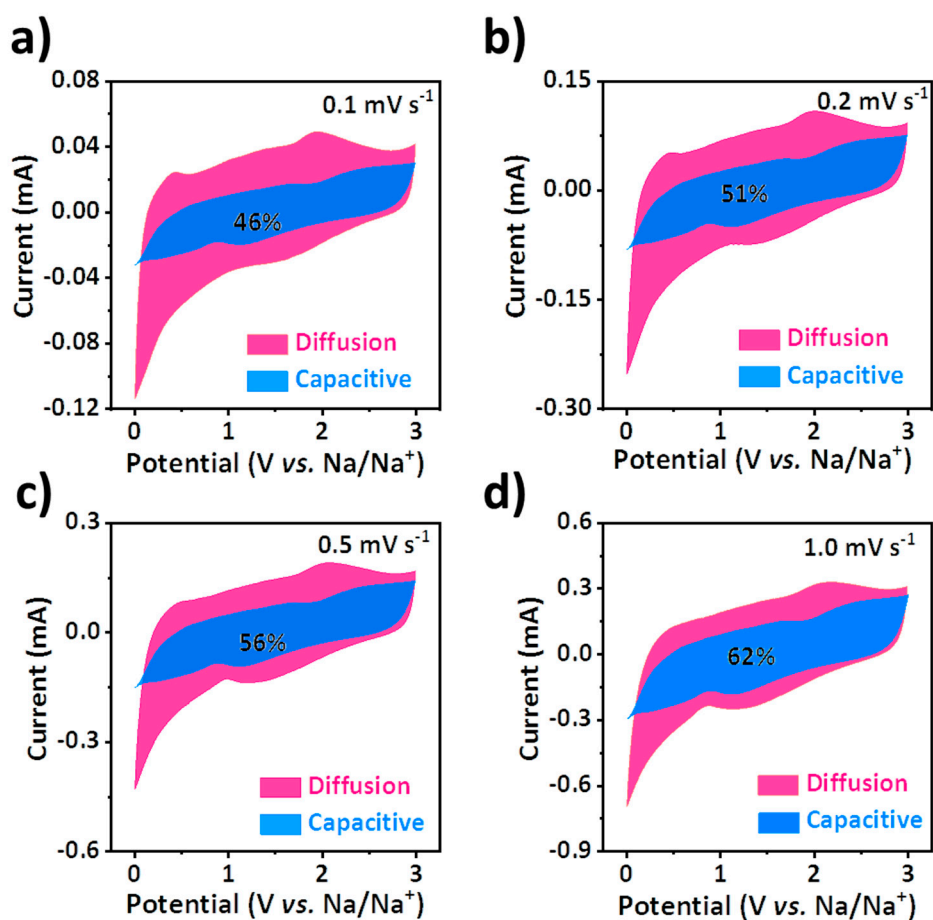

**Figure S4.** a-d) Capacitive-controlled and diffusion-controlled contributions at different scan rates of MoS<sub>2</sub>/C.

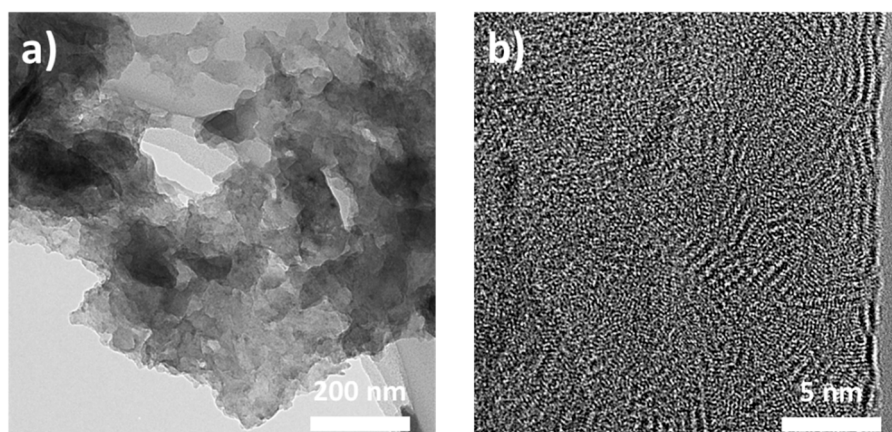

**Figure S5.** Morphology and nanostructure characterizations of MoS<sub>2</sub> electrode after 600 long-term cycles under the current density of 2.0 A g<sup>-1</sup>.

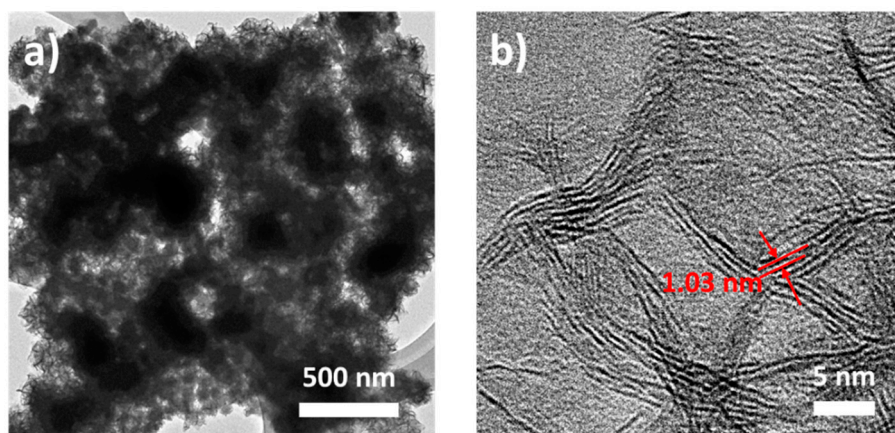

**Figure S6.** Morphology and nanostructure characterizations of MoS<sub>2</sub>/C electrode after 600 long-term cycles under the current density of 2.0 A g<sup>-1</sup>.

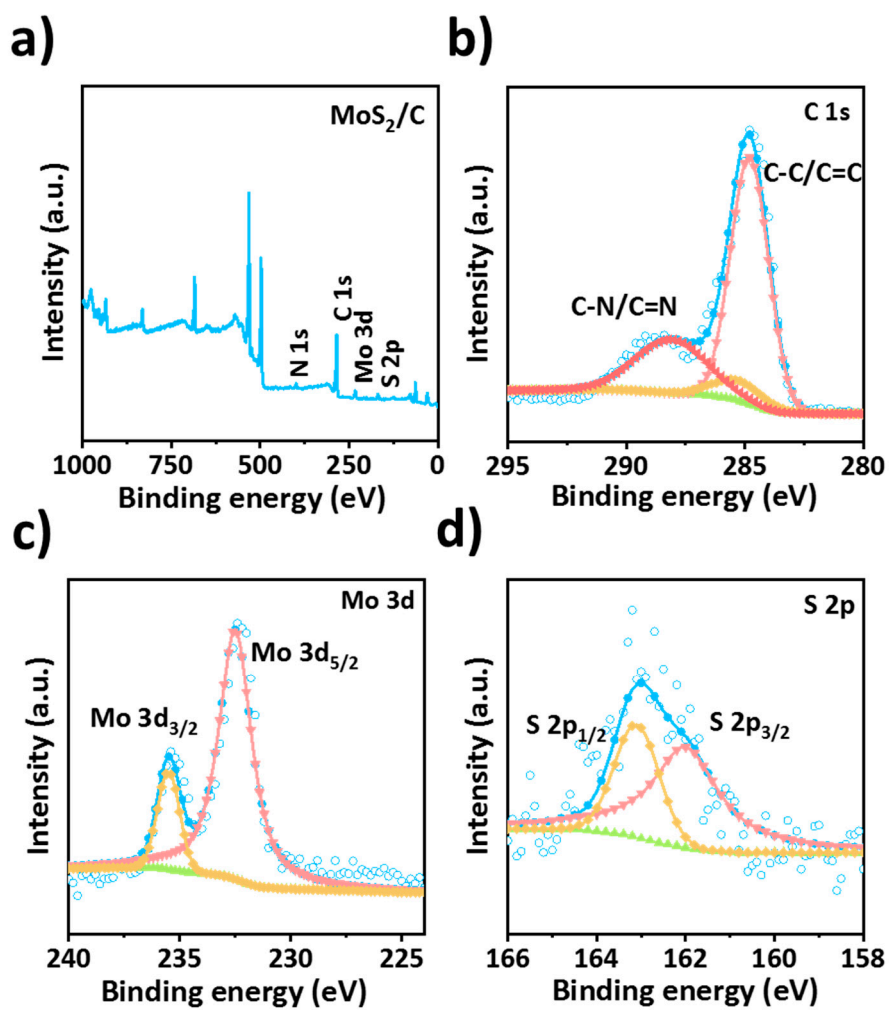

**Figure S7.** a) XPS full spectra and high-resolution b) C 1s, c) Mo 3d, and d) M S 2p spectra of MoS<sub>2</sub>/C after long-term cycles.

**Table S1.** Comparison of the rate and cycle performance between MoS<sub>2</sub>/C NFs with the recently reported MoS<sub>2</sub>-based anode materials.

|   | Sample                               | Voltage    | Rate                                                                                                               | Cycle                                                               | Reference               |
|---|--------------------------------------|------------|--------------------------------------------------------------------------------------------------------------------|---------------------------------------------------------------------|-------------------------|
|   | <b>MoS<sub>2</sub>/C NFs</b>         | 0.01-3.0 V | 1321, 1171, 1036, 819, and 632 mA h g <sup>-1</sup> at 0.1, 0.2, 0.5, 1.0, and 2.0 A g <sup>-1</sup>               | 438 mA h g <sup>-1</sup> at 2.0 A g <sup>-1</sup> after 600 cycles  | <b><i>This work</i></b> |
| 1 | MoS <sub>2</sub> /C                  | 0.01-3.0 V | 465, 427, 387, 352, and 313 mA h g <sup>-1</sup> at 0.1, 0.2, 0.5, 1.0, and 2.0 A g <sup>-1</sup>                  | 53 mA h g <sup>-1</sup> at 2.0 A g <sup>-1</sup> after 2000 cycles  | [1]                     |
| 2 | 3D MoS <sub>2</sub> /CP              | 0.4-3.0 V  | 490, 438, 377, 329, 274, and 225 mA h g <sup>-1</sup> at 0.05, 0.1, 0.3, 0.5, 1.0, and 2.0 A g <sup>-1</sup>       | 225 mA h g <sup>-1</sup> at 2.0 A g <sup>-1</sup> after 1000 cycles | [2]                     |
| 3 | Cu <sub>2</sub> S@C@MoS <sub>2</sub> | 0.1-3.0 V  | 430, 410, 386, 368, 359, 337, and 316 mA h g <sup>-1</sup> at 0.05, 0.1, 0.2, 0.3, 0.5, 1, and 2 A g <sup>-1</sup> | 309 mA h g <sup>-1</sup> at 0.3 A g <sup>-1</sup> after 200 cycles  | [3]                     |
| 4 | MoS <sub>2</sub> @SnO <sub>2</sub>   | 0.01-3.0 V | 525, 444, 287, 195, and 114 mA h g <sup>-1</sup> at 0.1, 0.5, 1.0, 2.0, and 5.0 A g <sup>-1</sup>                  | 262 mA h g <sup>-1</sup> at 2.0 A g <sup>-1</sup> after 500 cycles  | [4]                     |
| 5 | MoS <sub>2</sub> /CNT                | 0.01-3.0 V | 460, 346, 310, 230, and 146 mA h g <sup>-1</sup> at 1.0, 2.0, 5.0, 10, and 20.0 A g <sup>-1</sup>                  | 280 mA h g <sup>-1</sup> at 2.0 A g <sup>-1</sup> after 500 cycles  | [5]                     |
| 6 | MoS <sub>2</sub> /C                  | 0.0-3.0 V  | 530, 500, 370, 250, and 230 mA h g <sup>-1</sup> at 0.1, 0.2, 0.5, 1.0, 2.0 A g <sup>-1</sup>                      | 256 mA h g <sup>-1</sup> at 1.0 A g <sup>-1</sup> after 200 cycles  | [6]                     |

- [1] Xia, H.; Yuan, P.; Zan, L.; Qu, G.; Dong, H.; Wei, Y.; Yu, Y.; Wei, Z.; Yan, W.; Hu, J.S.; et al. Evolution of Stabilized 1T-MoS<sub>2</sub> by Atomic-Interface Engineering of 2H-MoS<sub>2</sub>/Fe-N<sub>x</sub> towards Enhanced Sodium Ion Storage. *Angew. Chem. Int. Ed.* **2023**, *62*, e202218282.
- [2] Zheng, F.; Wei, Z.; Xia, H.; Tu, Y.; Meng, X.; Zhu, K.; Zhao, J.; Zhu, Y.; Zhang, J.; Yang, Y.; et al. 3D MoS<sub>2</sub> foam integrated with carbon paper as binder-free anode for high performance sodium-ion batteries. *J. Energy Chem.* **2022**, *65*, 26–33.
- [3] Fang, Y.; Luan, D.; Chen, Y.; Gao, S.; Lou, X.W. Rationally Designed Three-Layered Cu<sub>2</sub>S@Carbon@MoS<sub>2</sub> Hierarchical Nanoboxes for Efficient Sodium Storage. *Angew. Chem.-Int. Ed.* **2020**, *59*, 7178–7183.
- [4] Gui, D.; Wei, Z.; Chen, J.; Yan, L.; Li, J.; Zhang P.; Zhao C. Boosting the sodium storage of the 1T/2H MoS<sub>2</sub>@SnO<sub>2</sub> heterostructure via a fast surface redox reaction. *J. Mater. Chem. A.* **2021**, *9*, 463–471.
- [5] Han, W.; Xia, Y.; Yang, D.; Dong, A. Exfoliation of large-flake, few-layer MoS<sub>2</sub> nanosheets mediated by carbon nanotubes. *Chem. Communications.* **2021**, *57*, 4400–4403
- [6] Wang, Y.; Yang, Y.; Zhang, D.; Wang, Y.; Luo, X.; Liu, X.; Kim, J.K.; Luo, Y. Inter-overlapped MoS<sub>2</sub>/C composites with large-interlayer-spacing for high-performance sodium-ion batteries. *Nanoscale Horiz.* **2020**, *5*, 1127–1135
